# Supplementary material for: Bcr-TMP, a Novel Nanomolar-Active Compound That Exhibits Both MYB- and Microtubule-Inhibitory Activity
Source: MDPI journal article supplement (doi:10.3390/cancers14010043), 2021-12-23
Supplement: s1 [file s1]

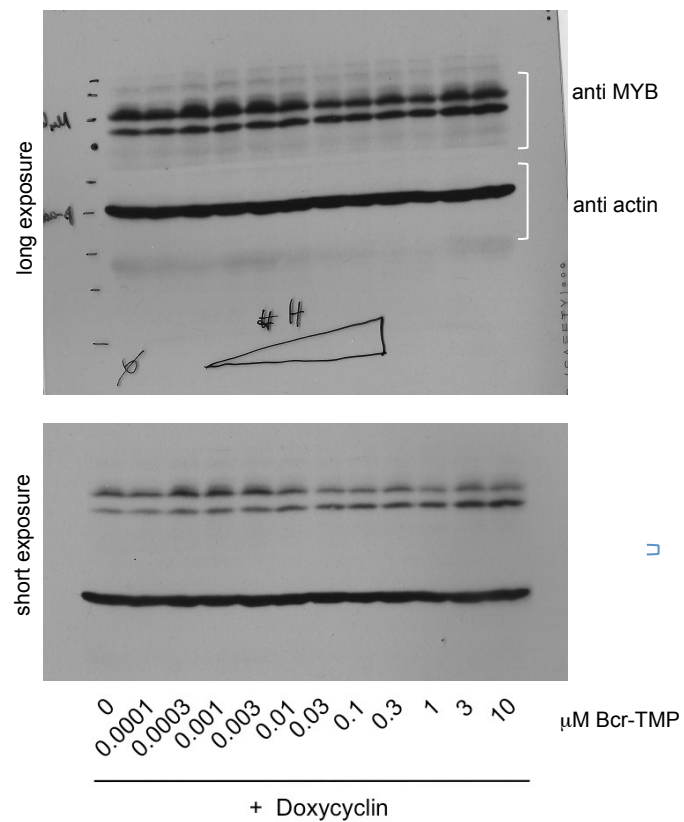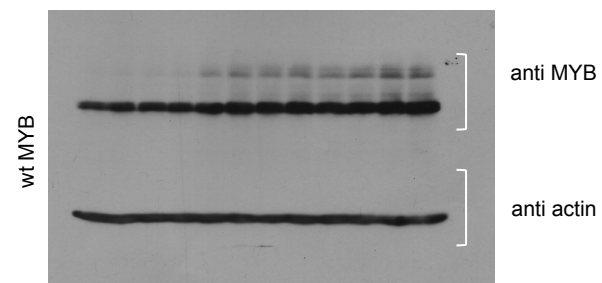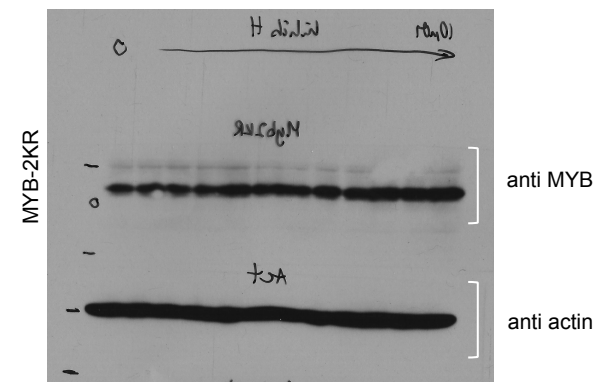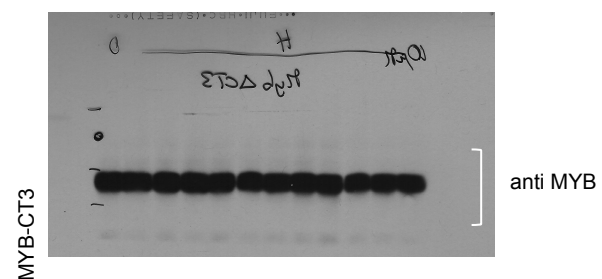

0  $\mu\text{M}$  Bcr-TMP is the first sample on the left,  
the last sample on the right is 10  $\mu\text{M}$  in each case

Figure S1. Uncropped Western blots for Figure 1B,C

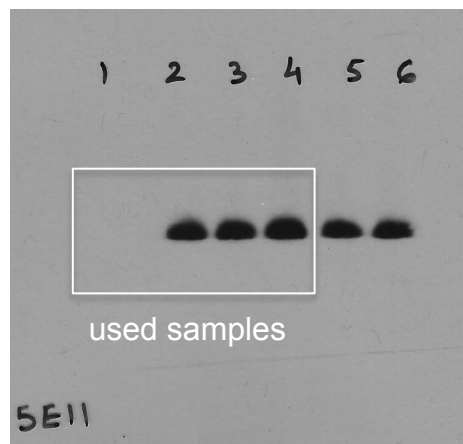

1. Untransfected
2. MYB-CT3 transfected, 0 mM Bcr-MP
3. MYB-CT3 transfected, 1 nM Bcr-MP
4. MYB-CT3 transfected, 30 nM Bcr-MP
5. and 6: irrelevant samples

Compound, nM      0   10   30   100   300      0   10   30   100   300

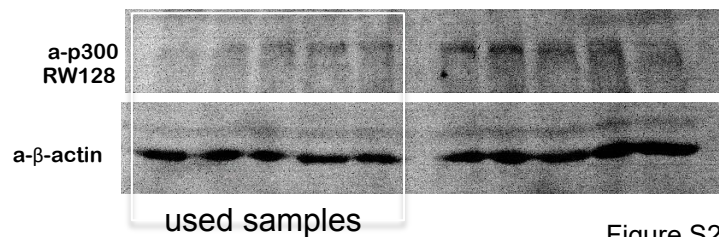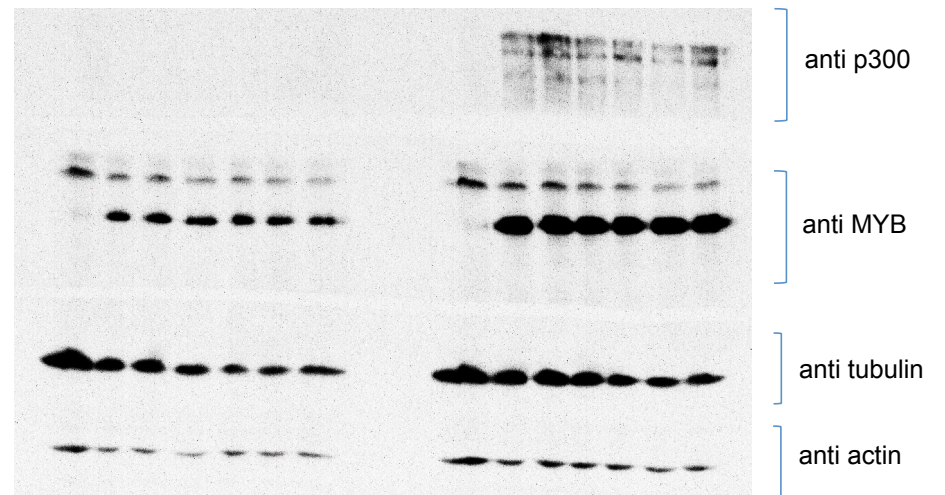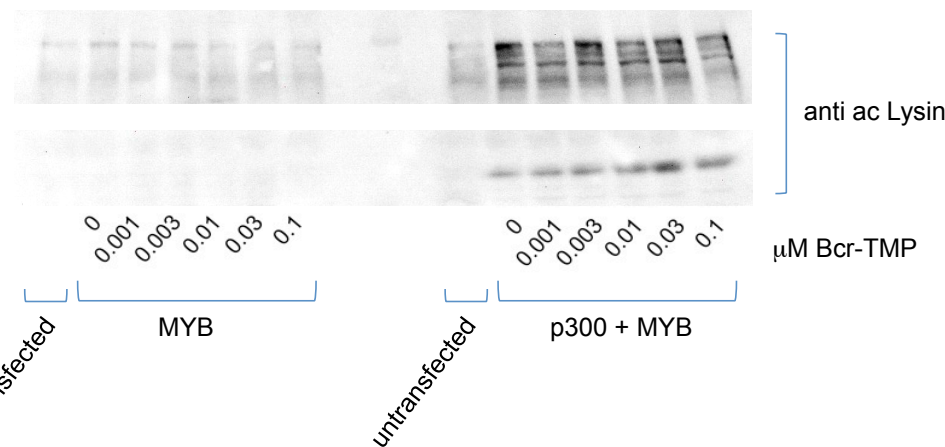

Figure S2. Uncropped Western blots for Figure 2A,E,D

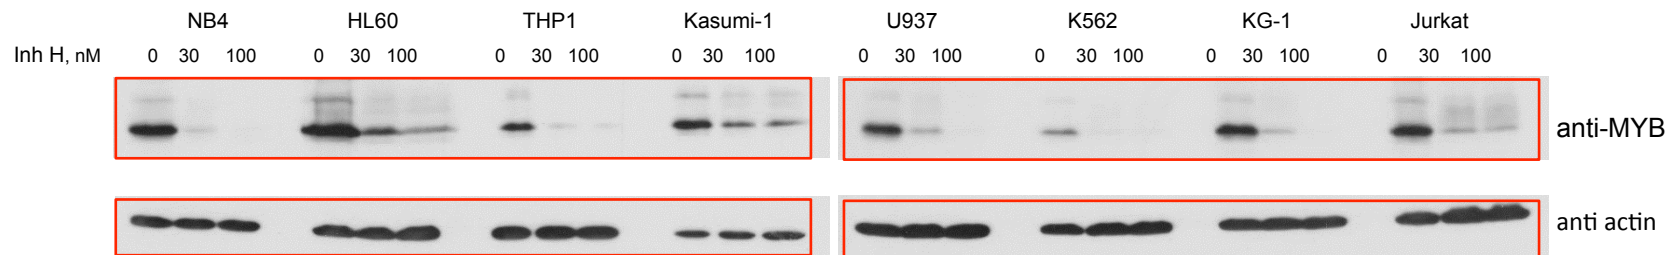

used samples marked by red lines

| MG132, 5 $\mu$ M | - | -  | -  | -  | -  | -   | + | +  | +  | +  | +  | +   |
|------------------|---|----|----|----|----|-----|---|----|----|----|----|-----|
| Bcr-TMP, nM      | 0 | 10 | 20 | 30 | 60 | 100 | 0 | 10 | 20 | 30 | 60 | 100 |

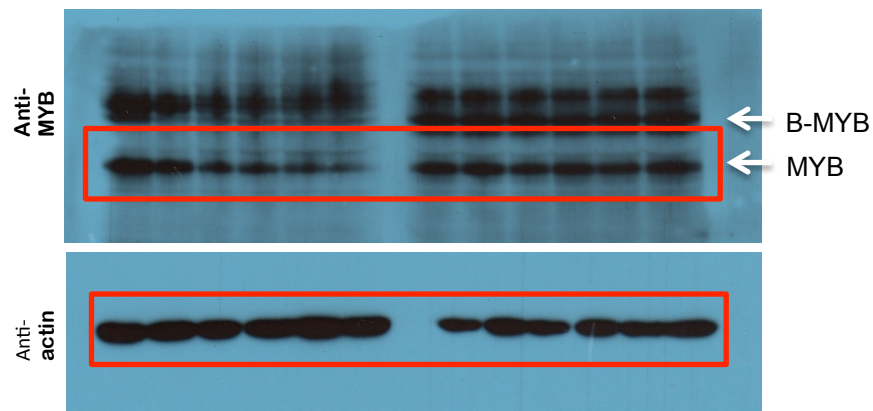

4 hr treatment

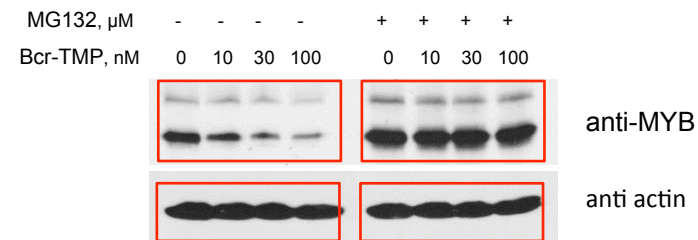

used samples marked by red lines

16 hr treatment

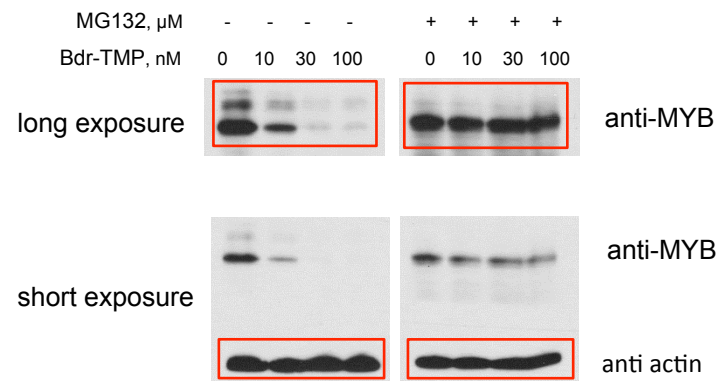

WB 2020-03-31

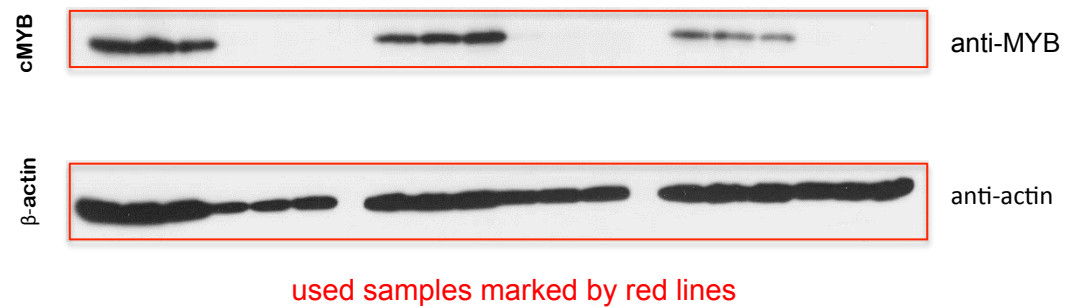

WB 2020-06-22

24 hours

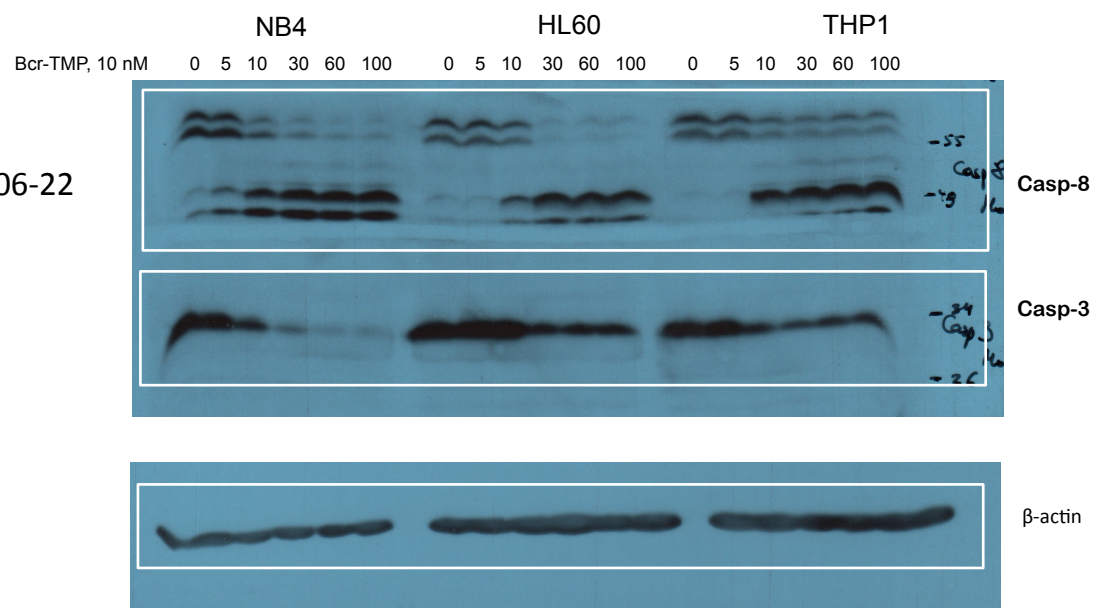

Figure S3. Uncropped Western blots for Figure 3B,C,E,F,G



WB 2019-11-01

(30.10.2019)

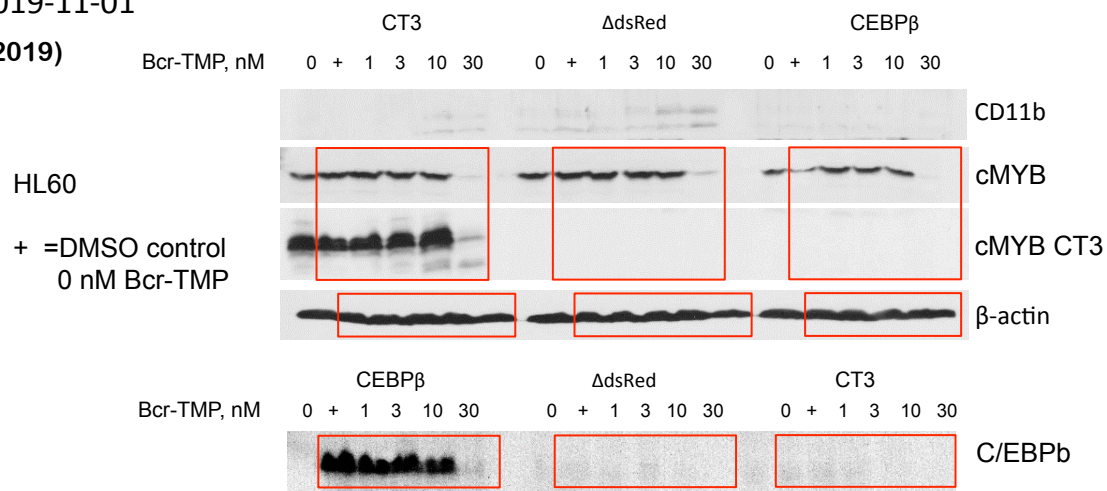

used samples marked by red lines

2021-06-15

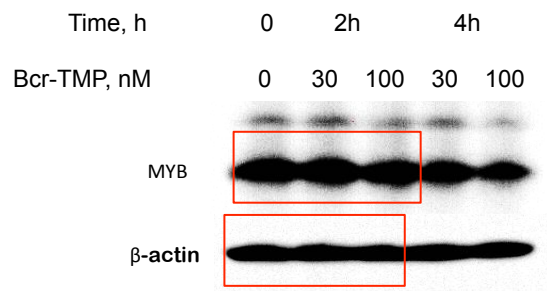

used samples

Figure S4. Uncropped Western blots for Figure 4B,C
